# Supplementary material for: Interfacial study of Cu2O/Ga2O3/AZO/TiO2 photocathode for water splitting fabricated by pulsed laser deposition
Source: Royal Society of Chemistry journal article supplement (doi:10.1039/c7cy00040e), 2017-01-01
Supplement: c7cy00040e1.pdf [file c7cy00040e1.pdf]

# The interfacial study on the $\text{Cu}_2\text{O}/\text{Ga}_2\text{O}_3/\text{AZO}/\text{TiO}_2$ photocathode for water splitting fabricated by pulsed laser deposition

Wenzhe Niu<sup>a</sup>, Liping Zhu<sup>a\*</sup>, Yichen Wang<sup>a</sup>, Zirui Lou<sup>a</sup> and Zhizhen Ye<sup>a</sup>

<sup>a</sup> State Key Laboratory of Silicon Materials, Zhejiang University, School of Materials  
Science and Engineering, Hangzhou, Zhejiang, China.

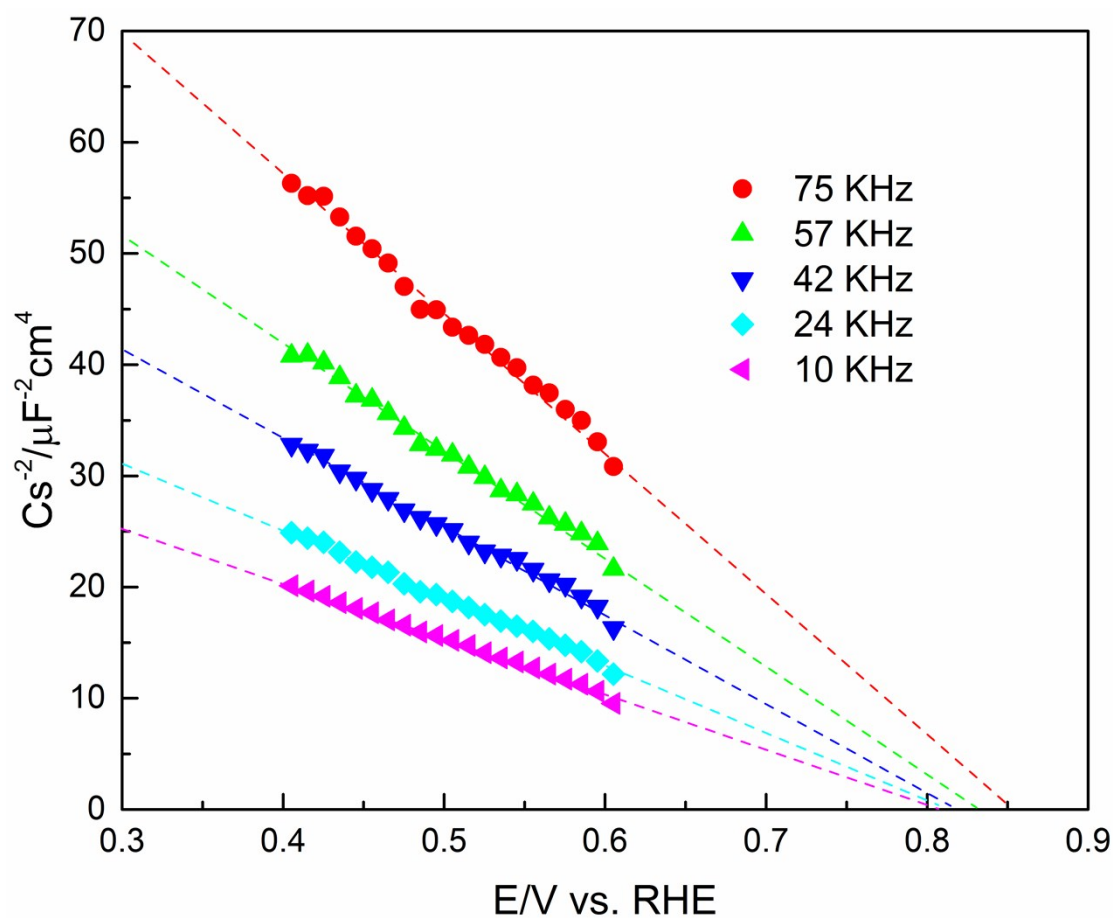

**Figure S1.** Mott-Schottky plot for the  $\text{Cu}_2\text{O}$  film from electrochemical impedance analysis in 0.1 M KOH solution (pH=13) in the dark.

The electrochemical impedance spectroscopy was carried out for the bare Cu<sub>2</sub>O sample. For the bare Cu<sub>2</sub>O, the electrolyte was 0.1M KOH in water (pH=13). The Cu<sub>2</sub>O layer was scanned from 0.4V/RHE to 0.6V/RHE in dark and the frequencies were varied from 100KHz to 100mHz. Capacitance–voltage measurements and Mott–Schottky analysis were performed to get the flat band potential  $E_{fb}$  and the intrinsic accept density  $N_A$  in the near-surface region by the following equation:

$$\frac{1}{C^2} = \frac{2}{e\epsilon\epsilon_0 N_A} \left( E - E_{fb} - \frac{kT}{e} \right)$$

Where C is the space-charge capacitance of the semiconductor;  $e$  is the electron charge;  $\epsilon_0$  is the permittivity in vacuum;  $\epsilon$  is the dielectric constant and E is the applied potential. The linear fit can extrapolate the flat band and the slope of the linear fit is an estimation of the charge carrier concentration. As show in Figure S1, the measured flat band potential was about +0.82 V/RHE. The carrier concentration calculated from the high frequencies was in the range from  $1.7 \times 10^{17} \text{ cm}^{-3}$  to  $4.2 \times 10^{17} \text{ cm}^{-3}$  using  $\epsilon=6.6$  of Cu<sub>2</sub>O. We used the average value  $2.95 \times 10^{17} \text{ cm}^{-3}$ . These values agreed with previous results.

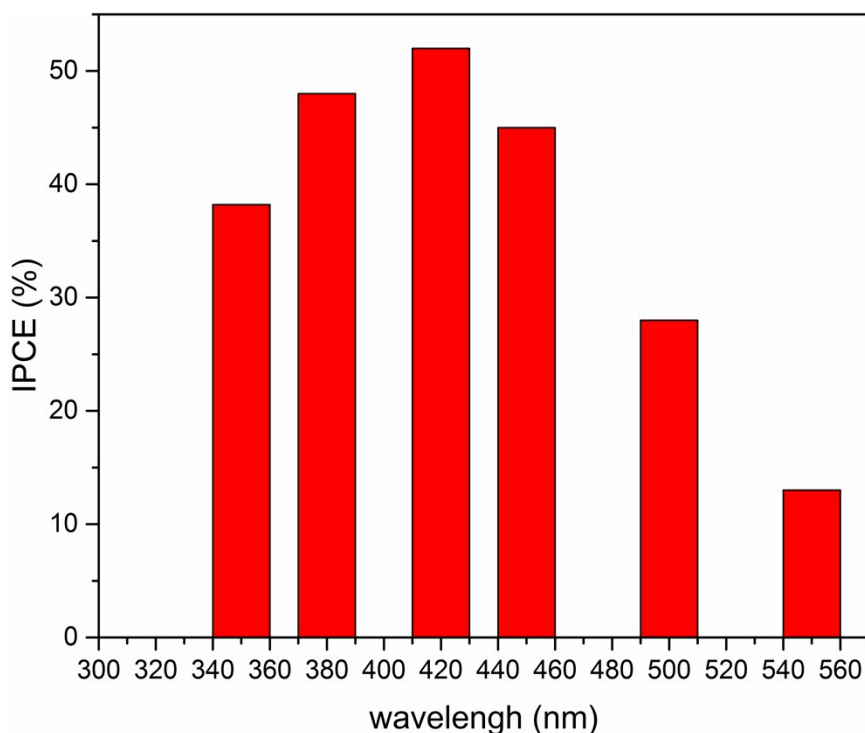

**Figure S2.** Wavelength dependence of IPCE measured at 0 V vs. RHE for the sample with Ga<sub>2</sub>O<sub>3</sub> of 10Pa.

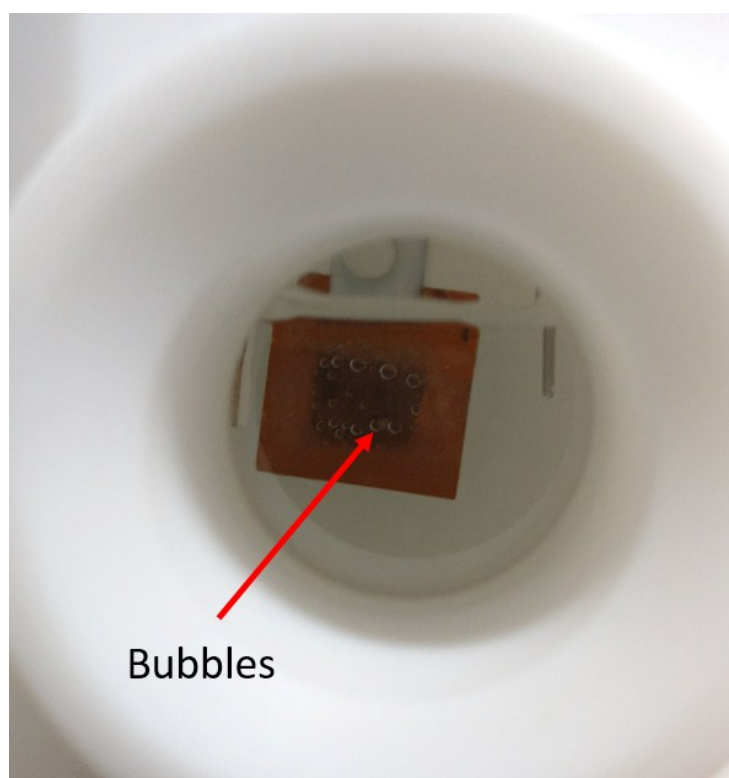

**Figure S3.** H<sub>2</sub> bubbles evolving from the illuminated photocathode biased at 0 V vs. RHE.

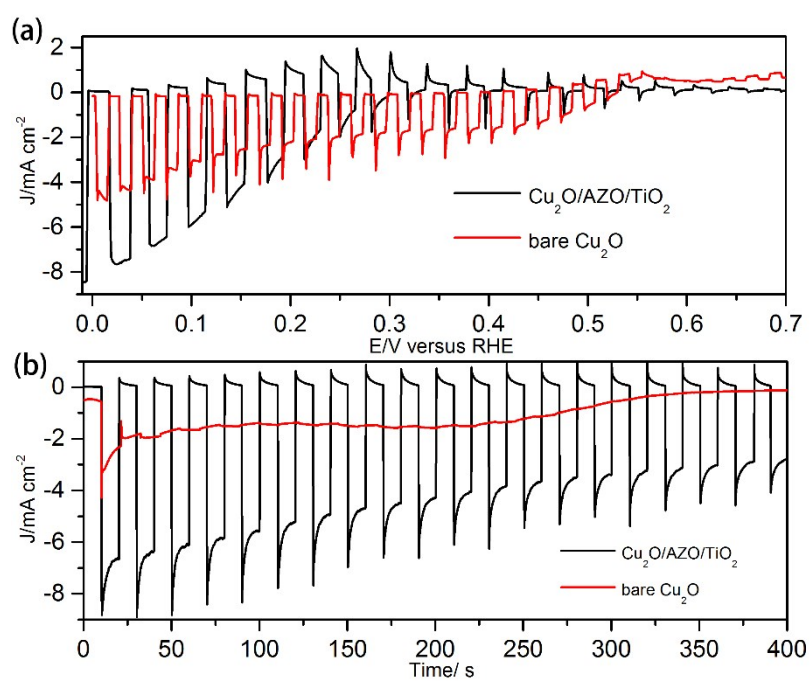

**Figure S4.** The photocurrent (a) and stability (b) of photocathode without the Ga<sub>2</sub>O<sub>3</sub> and bare Cu<sub>2</sub>O.

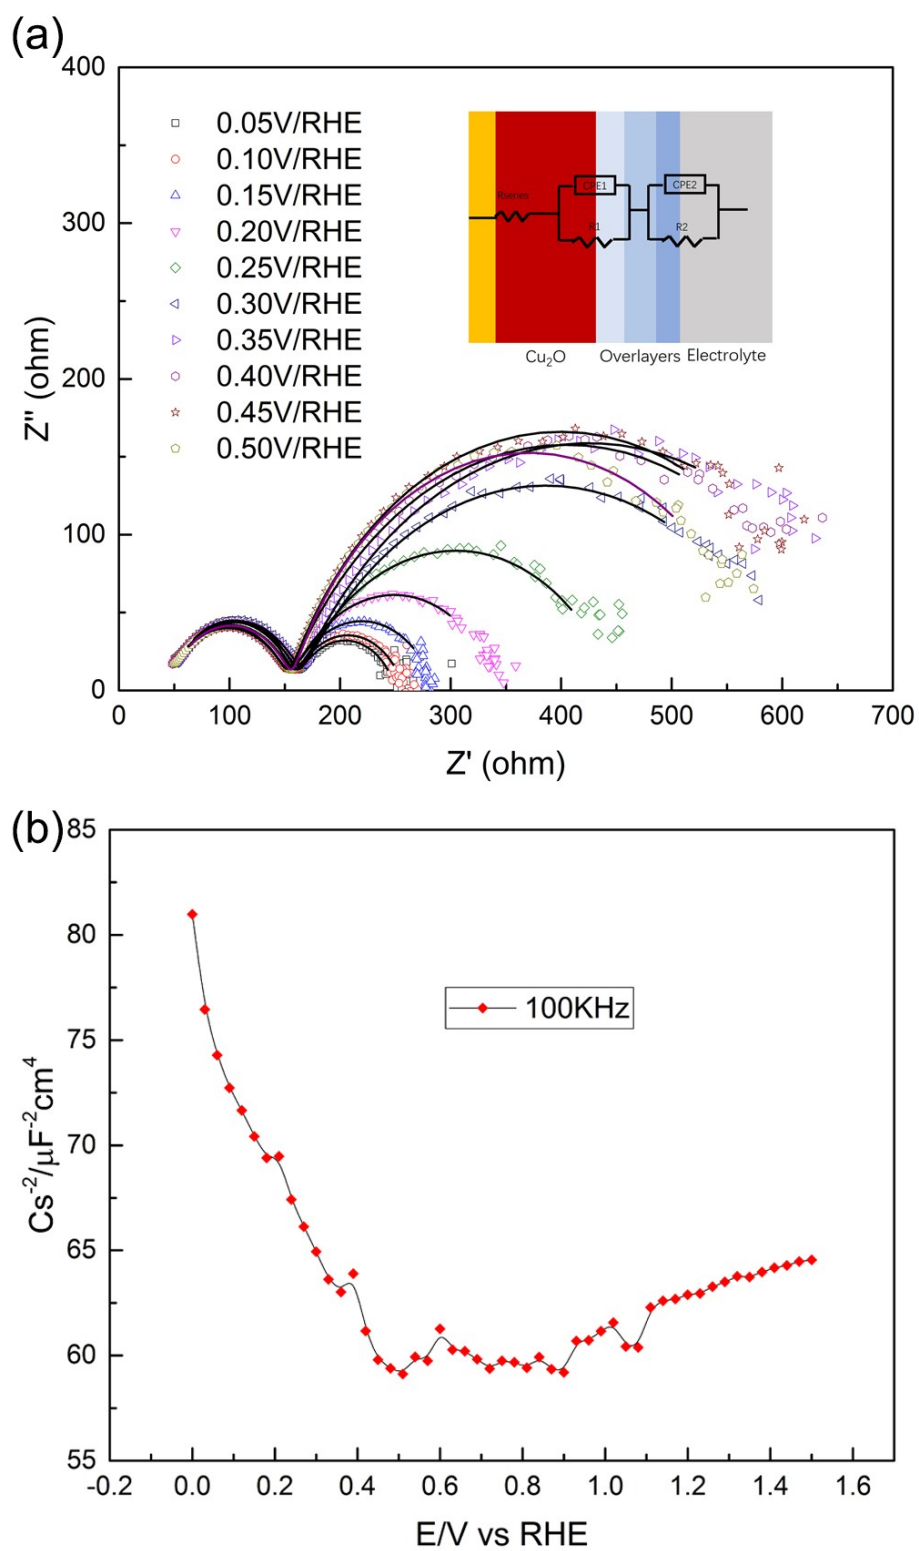

**Figure S5.** (a) Impedance spectra of Cu<sub>2</sub>O/Ga<sub>2</sub>O<sub>3</sub>/AZO/TiO<sub>2</sub> photocathode under 1 sun light. The inset shows the equivalent circuit used to fit the data. The black lines are fitted curve using this equivalent circuit. (b) Mott-Schottky (MS) plots of Cu<sub>2</sub>O/Ga<sub>2</sub>O<sub>3</sub>/AZO/TiO<sub>2</sub> photocathode measured at 100KHz with 10mV amplitude.

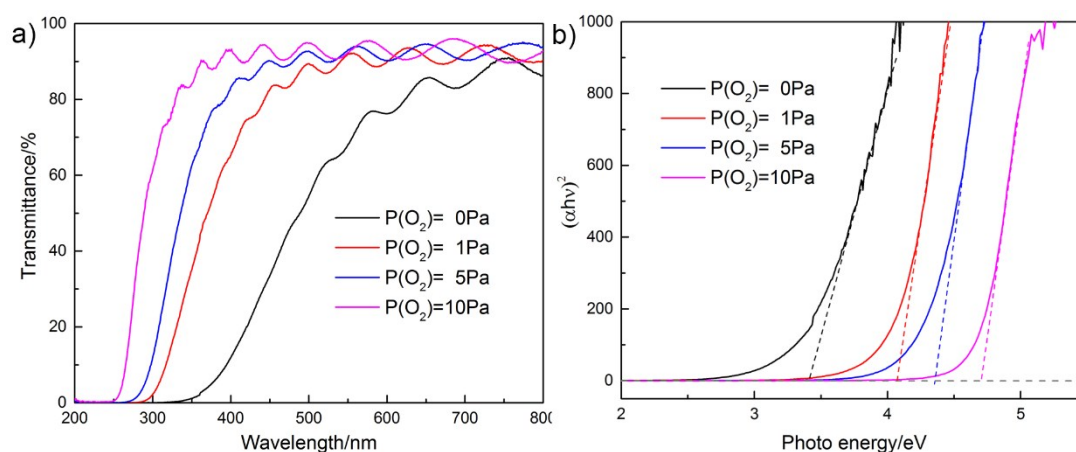

**Figure S6.** The transmittance (a) and the optical band gap (b) of  $\text{Ga}_2\text{O}_3$  thin film deposited under different oxygen pressure.

**Table S1** Binding energies and valence band maximum of  $\text{Cu}_2\text{O}$  layer,  $\text{Ga}_2\text{O}_3$  layer (on  $\text{Cu}_2\text{O}$  layer). And binding energies (Ga, Cu) of the interface of  $\text{Ga}_2\text{O}_3/\text{Cu}_2\text{O}$ .

| Sample                                                                          | region   | Binding energy (eV) |
|---------------------------------------------------------------------------------|----------|---------------------|
| $\text{Cu}_2\text{O}$                                                           | Cu 2p3/2 | 932.49              |
|                                                                                 | VBM      | 0.39                |
| $\text{Ga}_2\text{O}_3$ ( $\text{P}(\text{O}_2)$ =1 Pa)                         | Ga 2p3/2 | 1117.00             |
|                                                                                 | VBM      | 2.54                |
| $\text{Ga}_2\text{O}_3$ ( $\text{P}(\text{O}_2)$ =1 Pa)/ $\text{Cu}_2\text{O}$  | Cu 2p3/2 | 932.80              |
|                                                                                 | Ga 2p3/2 | 1117.80             |
| $\text{Ga}_2\text{O}_3$ ( $\text{P}(\text{O}_2)$ =10 Pa)                        | Ga 2p3/2 | 1118.22             |
|                                                                                 | VBM      | 3.27                |
| $\text{Ga}_2\text{O}_3$ ( $\text{P}(\text{O}_2)$ =10 Pa)/ $\text{Cu}_2\text{O}$ | Cu 2p3/2 | 932.12              |
|                                                                                 | Ga 2p3/2 | 1117.70             |

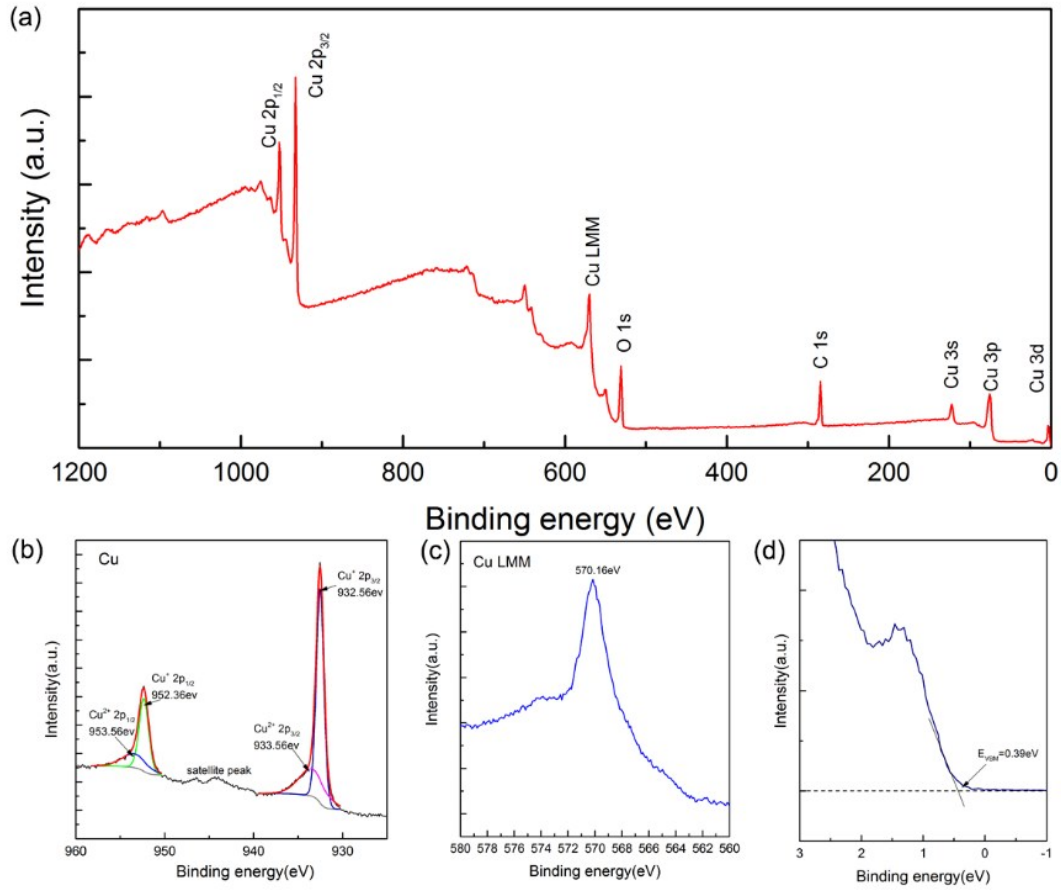

**Figure S7.** The XPS spectrum of the bare Cu<sub>2</sub>O film. (a) The wide spectrum. (b) Cu 2p region. (c) Cu LMM peak. (d) The valence band maximum position.

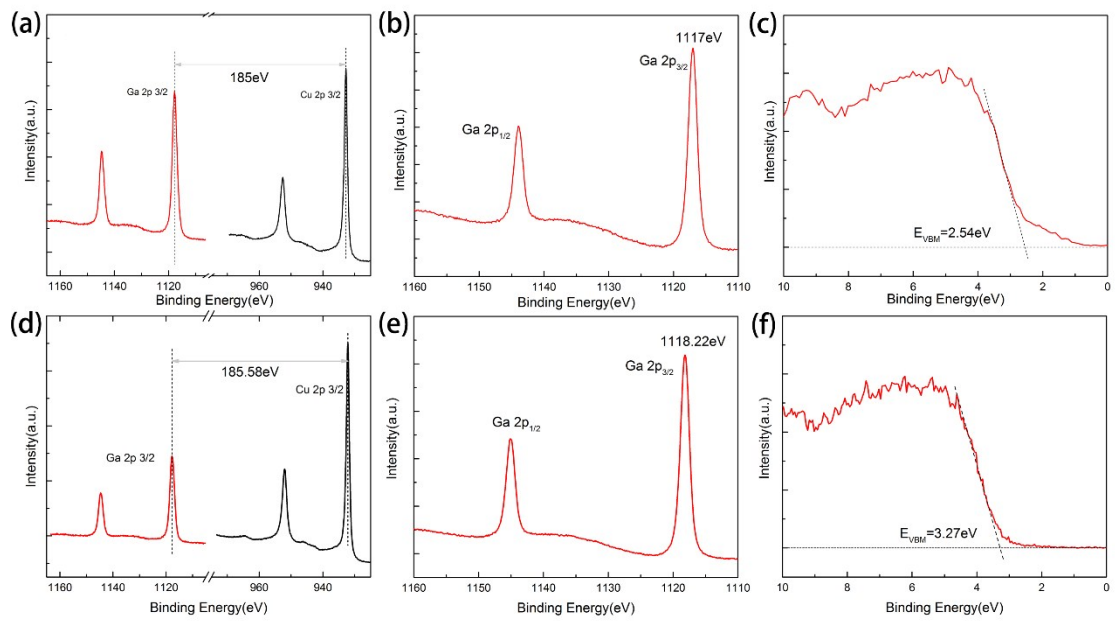

**Figure S8.** The Ga 2p and Cu 2p spectrum of sample with ultrathin Ga<sub>2</sub>O<sub>3</sub> film on Cu<sub>2</sub>O (a)(d), the Ga 2p spectrum (b)(e) and VBM spectrum (c)(f) of sample with thick Ga<sub>2</sub>O<sub>3</sub> film on Cu<sub>2</sub>O under the oxygen pressure for Ga<sub>2</sub>O<sub>3</sub> deposition of 1Pa (a)(b)(c) and 10Pa (d)(e)(f).

The  $\Delta E_{CB}$  at Cu<sub>2</sub>O/Ga<sub>2</sub>O<sub>3</sub> heterojunction was calculated according the following equation:

$$\Delta E_{CB} = \left( E_{Ga-2p}^{Ga_2O_3/Cu_2O} - E_{Cu-2p}^{Ga_2O_3/Cu_2O} \right) + \left( E_{Cu-2p}^{Cu_2O} - E_{VBM}^{Cu_2O} \right) - \left( E_{Ga-2p}^{Ga_2O_3} - E_{VBM}^{Ga_2O_3} \right) + \left( E_{Eg}^{Cu_2O} - E_{Eg}^{Ga_2O_3} \right).$$

The  $\left( E_{Ga-2p}^{Ga_2O_3/Cu_2O} - E_{Cu-2p}^{Ga_2O_3/Cu_2O} \right)$  was obtained from the Cu<sub>2</sub>O sample with an ultrathin Ga<sub>2</sub>O<sub>3</sub> layer.

The bandgap of the bulk Cu<sub>2</sub>O were 2.1eV, and that of Ga<sub>2</sub>O<sub>3</sub> was 4.07 and 4.69eV for oxygen pressure of 1Pa and 10Pa respectively, which is extracted from Figure S3.

### Band diagram

First, to form the p-n junction, all the Fermi levels of these layers will be equivalent. In the solution at 0V/RHE, all the Fermi level are equivalent at the hydrogen redox potential. We assume the pinning of band edge at the interface.

Even though Ga<sub>2</sub>O<sub>3</sub> is a n-type semiconductor, the carrier concentration of amorphous Ga<sub>2</sub>O<sub>3</sub> is very low, which can be indicated by the valence band edge in the XPS data. We tried to measure it by Hall system using van der Pauw method. But it also showed it is unmeasurable. Apparently, the electron concentration is not enough to form the p-n junction. Here, we can think nearly all the electrons are from the AZO layer, because the electron concentration of AZO is much higher than that of Ga<sub>2</sub>O<sub>3</sub>. We can estimate the thickness of the depletion layers by the equation:

$$N_D x_n = N_A x_p$$

Where  $N_D$  and  $N_A$  are the carrier concentration in AZO and Cu<sub>2</sub>O, and  $x_n$  and  $x_p$  are the thickness of depletion layer in AZO and Cu<sub>2</sub>O. The  $N_A$  of Cu<sub>2</sub>O is calculated to be about  $2.95 \times 10^{17} \text{ cm}^{-3}$  while the  $N_D$  of AZO is up to  $10^{21} \text{ cm}^{-3}$ . Most of the depletion layer of p-n junction is in the Cu<sub>2</sub>O side. Further with the equation:

$$V_{bi}(p) = \frac{q N_A x_p^2}{2 \epsilon_{Cu_2O}}$$

For the expected build-in bias of 0.4V and 0.8V, which is estimated from Fig. 5(c), the depletion layer thickness in the Cu<sub>2</sub>O ( $x_p$ ) is approximately 140nm and 197nm.

For the  $\text{Ga}_2\text{O}_3$  at the  $\text{Cu}_2\text{O}/\text{Ga}_2\text{O}_3$  and  $\text{Ga}_2\text{O}_3/\text{AZO}$ , the bending offset was determined mainly by the energy offset between the Fermi level and the hydrogen redox potential while the thickness of the depletion layer was not easy to estimate. What can we know is, on one hand, the thickness of n-type  $\text{Ga}_2\text{O}_3$  at the  $\text{Cu}_2\text{O}/\text{Ga}_2\text{O}_3$  interface should be wide to form the p-n junction. On the other hand, there will be also a downward bending of  $\text{Ga}_2\text{O}_3$  at the n- $\text{Ga}_2\text{O}_3$ /n-AZO junction interface due to the different doping level.

As for the interface of AZO/ $\text{TiO}_2$  and  $\text{TiO}_2$  electrolyte, we assume the pinning of the band edge at the interface as the way from the literature. The electron concentration of these two layers is very high, So the thickness of depletion layers will be very thin

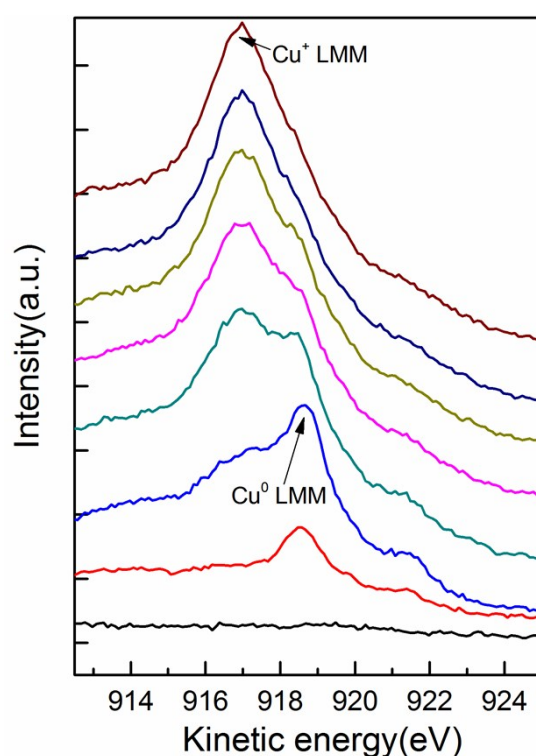

**Figure S9.** Cu LMM depth profiling as the etching time increase for the sample under oxygen pressure of 1Pa.
